# Supplementary material for: An immunosuppressive macrophage profile attenuates the prognostic impact of CD20-positive B cells in human soft tissue sarcoma
Source: Springer Nature journal article supplement (doi:10.1007/s00262-019-02322-y), 2019-03-16
Supplement: MOESM1 [file 16553782]

**a**

| IHC Scoring       | CD20 | CD19 | PAX5 |
|-------------------|------|------|------|
| 0 (negative)      | 17   | 27   | 17   |
| 1 (1-10 cells*)   | 6    | 2    | 10   |
| 2 (11-300 cells*) | 7    | 1    | 3    |
| 3 (>300 cells*)   | 0    | 0    | 0    |

\*Estimated number of cells/tissue section (0.8 cm<sup>2</sup>)

**b**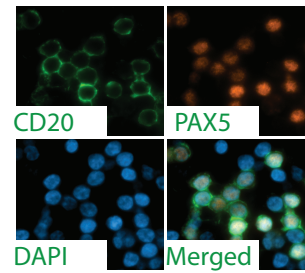**Supplementary Fig. 1** CD20-positive B cells often coexpress PAX5.

**a** Overview of the IHC scoring for B cell markers in the Karolinska STS cohort.

Note: 15 out of the 17 tumors that were scored negative for CD20 were also negative for PAX5. **b** Immunostaining for CD20 and PAX5 in STS tissue sections showing that the vast majority of CD20-positive cells coexpress PAX5.

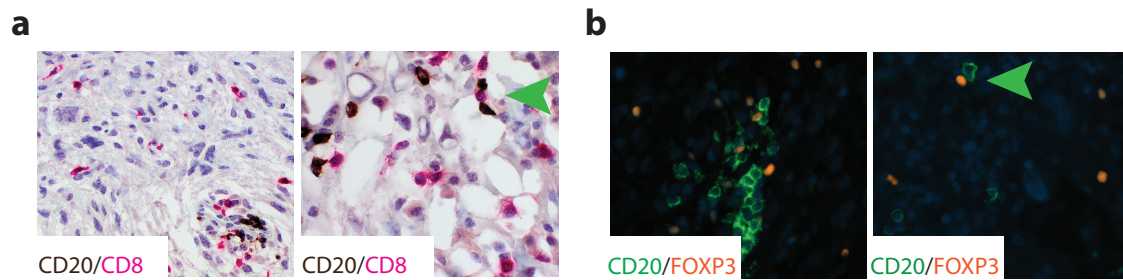

**Supplementary Fig. 2** CD20-positive cells interact with CD8-positive cells and FOXP3-positive cells. **a** Multiplex IHC for CD20 (brown) and CD8 (red), Htx as counterstain, demonstrating direct cell-cell interactions. **b** Immunostaining for CD20 (green fluorophore) and FOXP3 (red chromogenic, fluorescent substrate) demonstrating direct cell-cell interactions. Nuclei are visualized by DAPI.



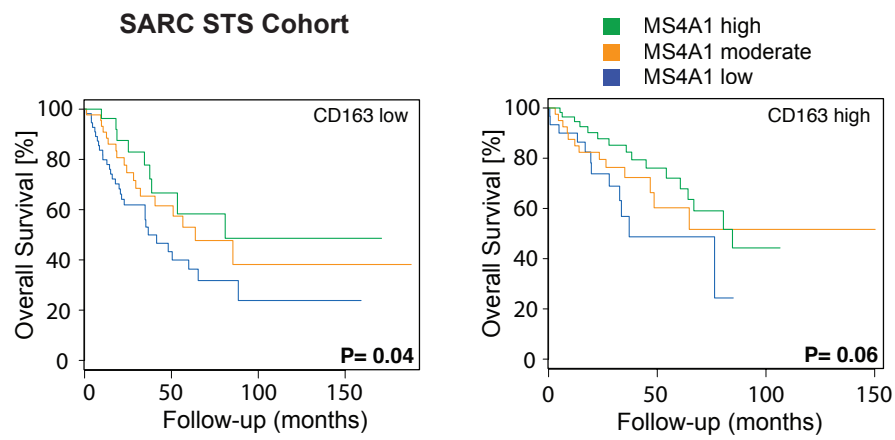

**Supplementary Fig. 3** Kaplan–Meier analysis illustrating the prognostic impact of MS4A1 expression in the SARC STS cohort comparing tumors with low and high expression of CD163.

**Supplementary Table 1** Prognostic significance of CD20 IHC score in comparison to other previously reported prognostic factors. Kaplan–Meier survival analysis using the log-rank test for comparison between groups in the Karolinska STS cohort. The results remained significant in a multivariate Cox regression analysis (see table foot notes and text for details).

| Prognostic Factor    | Metastasis-free Survival         |                 | Overall Survival                 |                 |
|----------------------|----------------------------------|-----------------|----------------------------------|-----------------|
|                      | Survival in months<br>(95% C.I.) | P<br>(log rank) | Survival in months<br>(95% C.I.) | P<br>(log rank) |
| CD20                 |                                  |                 |                                  |                 |
| low                  | 29 (16-41)                       | 0.009†          | 34 (22-45)                       | 0.022†          |
| high                 | 61 (50-72)                       |                 | 60 (51-69)                       |                 |
| Tumor volume         |                                  |                 |                                  |                 |
| small                | 50 (37-61)                       | 0.142           | 50 (37-61)                       | 0.231           |
| large                | 35 (22-49)                       |                 | 37 (24-51)                       |                 |
| Tumor grade          |                                  |                 |                                  |                 |
| 3                    | 57 (45-70)                       | 0.044†          | 61 (50-72)                       | 0.016†          |
| 4                    | 39 (28-50)                       |                 | 40 (28-50)                       |                 |
| Necrosis             |                                  |                 |                                  |                 |
| No                   | 48 (47-49)                       | 0.822           | 48 (47-49)                       | 0.900           |
| Yes                  | 41 (31-51)                       |                 | 42 (32-52)                       |                 |
| Intravascular growth |                                  |                 |                                  |                 |
| No                   | 48 (37-58)                       | 0.730           | 50 (38-60)                       | 0.637           |
| Yes                  | 36 (15-57)                       |                 | 36 (15-57)                       |                 |

†P<0.05 in multivariate Cox regression

**Supplementary Table 2** Co-occurrence of analyzed M1/M2 macrophage gene expression markers in the SARC STS cohort. A gene coexpression analysis demonstrates a correlation between the M1 macrophage markers NOS2 and NOS3, and a correlation between the M2 macrophage markers CD163 and IL10, using the cBioportal software analysis tool.

| Gene A | Gene B | Neither | A Not B | B Not A | Both | Log Odds Ratio        | P Value          | Adjusted*    |
|--------|--------|---------|---------|---------|------|-----------------------|------------------|--------------|
| NOS2   | NOS3   | 251     | 3       | 6       | 3    | >3 (co-occurrence)    | <b>&lt;0.001</b> | <b>0.005</b> |
| IL10   | CD163  | 242     | 8       | 9       | 4    | 2.599 (co-occurrence) | <b>0.001</b>     | <b>0.014</b> |
| IL10   | PTGS2  | 238     | 12      | 13      | 0    | <-3                   | 0.537            | 1.000        |
| PTGS2  | CD163  | 237     | 13      | 13      | 0    | <-3                   | 0.509            | 1.000        |
| IL10   | NOS2   | 245     | 12      | 6       | 0    | <-3                   | 0.754            | 1.000        |
| PTGS2  | NOS2   | 244     | 13      | 6       | 0    | <-3                   | 0.736            | 1.000        |
| CD163  | NOS2   | 244     | 13      | 6       | 0    | <-3                   | 0.736            | 1.000        |
| IL10   | NOS3   | 242     | 12      | 9       | 0    | <-3                   | 0.652            | 1.000        |
| PTGS2  | NOS3   | 242     | 12      | 8       | 1    | 0.925                 | 0.371            | 1.000        |
| CD163  | NOS3   | 241     | 13      | 9       | 0    | <-3                   | 0.629            | 1.000        |

\*Bonferroni adjusted P Value.
